# Supplementary material
Source: PubMed Central journal article supplement (PMC2567932)
Supplement: 108.138909_1.pdf [file 108.138909_1.pdf]

Supplemental Data for:

## Biophysical studies on stability of DNA intrastrand cross-links of transplatin

Jana Kasparkova\*, Victoria Marini\*, Vendula Bursova\*, and Viktor Brabec\*<sup>#,</sup>

\*Institute of Biophysics, Academy of Sciences of the Czech Republic, v.v.i., Kralovopolska 135, CZ-61265 Brno, Czech Republic; <sup>#</sup>Laboratory of Biophysics, Department of Experimental Physics, Faculty of Sciences, Palacky University, tr. Svobody 26, CZ-77146 Olomouc, Czech Republic

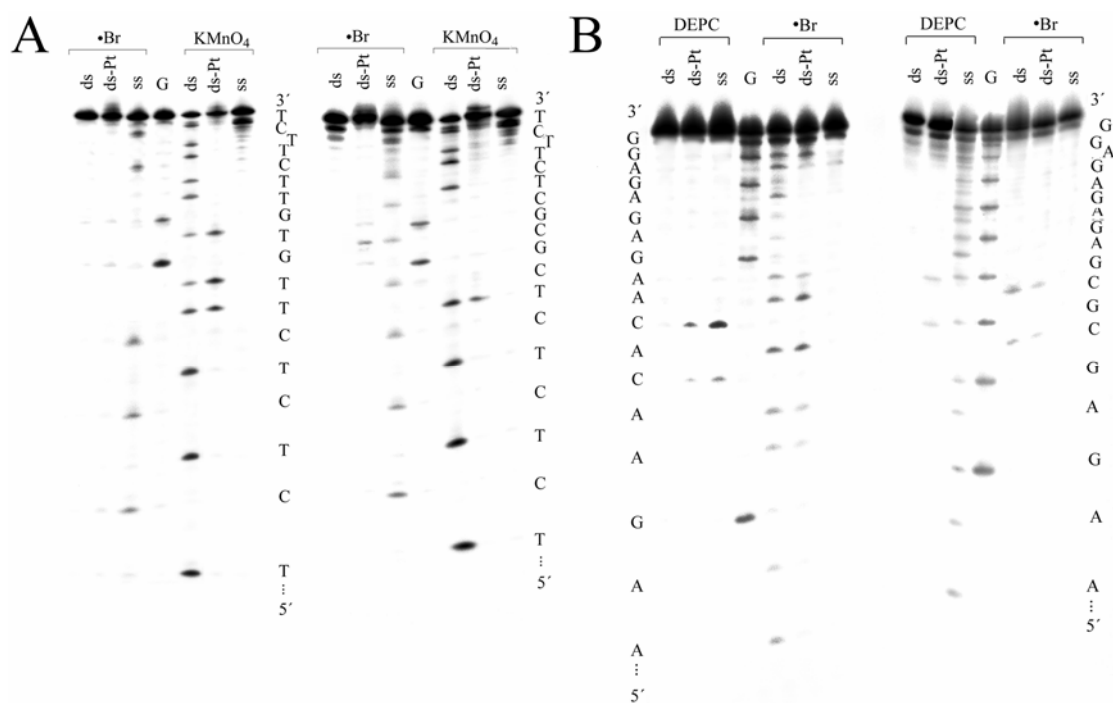

FIGURE S1 Chemical probes of DNA conformation. Piperidine-induced specific strand cleavage at KMnO<sub>4</sub>-modified, KBr/KHSO<sub>5</sub>-modified and DEPC-modified bases in the 20-bp duplexes TGTGT (left panels in Figures S1A and B) or CGCGC (right panels in Figures S1 A and B) unplatinated or containing single, 1,3-GNG intrastrand cross-link of transplatin. Lanes: ds, the unplatinated duplex; ds-Pt, the duplex containing a unique 1,3-GNG intrastrand cross-link of transplatin; ss, the unplatinated strand; G, a Maxam-Gilbert specific reaction for the unplatinated duplex. The oligomers were 5'-end labeled at the top (A) or bottom (B) strand.
